# Supplementary material for: The Chromosome 9p21 CVD- and T2D-Associated Regions in a Norwegian Population (The HUNT2 Survey)
Source: Int J Endocrinol. 2015 May 18;2015:164652. doi: 10.1155/2015/164652 (PMC4451520; doi:10.1155/2015/164652)
Supplement: Supplementary file 1 — Sheet AP: Association results for angina pectoris (AP) from single and two-point haplotype analysis after correction for gender, age, BMI, diabetes and smoking. Sheet MI: Association results for myocardial infarction (MI) from single and two-point haplotype analysis after correction for gender, age, BMI, diabetes and smoking. Sheet MI+AP: Association results for both angina pectoris and myocardial infarction from single and two-point haplotype analysis after correction for gender, age, BMI, diabetes and smoking. Sheet Stroke: Association results for stroke from single and two-point haplotype analysis after correction for gender, age, BMI, diabetes and smoking. [file 164652.f1.xlsx]

## Sheet: AP
		Single point		Two-point		Haplotype
SNP	Minor allele	OR (95% CI)	P	SNPs	Omnibus P	Haplotype	Freq.	OR	P
rs3217986	C	1.33 (1.05-1.68)	0.01919	rs3217986|rs523096	0.00484	AC / CT / AT	0.47 / 0.07 / 0.46	0.90 / 0.77 / 1.19	0.10 / 0.03 / 3.79E-03
rs523096	C	0.90 (0.80-1.01)	0.08474	rs523096|rs10965215	0.424	CA / TA / CG / TG	0.03 / 0.40 / 0.45 / 0.12	0.97 / 1.09 / 0.90 / 1.05	0.90 / 0.17 / 0.10 / 0.59
rs10965215	A	1.08 (0.96-1.22)	0.192	rs10965215|rs564398	0.305	GG / AA / GA	0.45 / 0.43 / 0.12	0.91 / 1.09 / 1.03	0.13 / 0.18 / 0.77
rs564398	G	0.91 (0.81-1.02)	0.1137	rs564398|rs1333034	0.295	AG / GA / AA	0.12 / 0.45 / 0.44	1.02 / 0.91 / 1.09	0.80 / 0.12 / 0.17
rs1333034	G	1.03 (0.86-1.24)	0.7386	rs1333034|rs8181047	0.227	AA / GG / AG	0.34 / 0.11 / 0.55	0.90 / 1.06 / 1.08	0.11 / 0.56 / 0.20
rs8181047	A	0.89 (0.79-1.01)	0.07692	rs8181047|rs10811647	0.0434	GG / AC / GC	0.41 / 0.34 / 0.25	1.17 / 0.89 / 0.94	1.32E-02 / 0.08 / 0.41
rs10811647	G	1.17 (1.03-1.32)	0.01402	rs10811647|rs1333039	0.0491	CG / GC / CC	0.43 / 0.41 / 0.16	0.91 / 1.16 / 0.92	0.11 / 1.43E-02 / 0.29
rs1333039	G	0.91 (0.80-1.02)	0.1123	rs1333039|rs16905599	0.00377	CA / GG / CG	0.06 / 0.43 / 0.51	0.73 / 0.90 / 1.19	1.50E-02 / 0.10 / 4.24E-03
rs16905599	A	1.38 (1.06-1.78)	0.01507	rs16905599|rs1333040	0.00663	AC / GC / GT	0.06 / 0.38 / 0.56	0.70 / 0.91 / 1.18	9.14E-03 / 0.14 / 7.54E-03
rs1333040	C	1.19 (1.06-1.35)	0.00418	rs1333040|rs10757278	0.00536	CG / TG / CA / TA	0.04 / 0.45 / 0.39 / 0.11	0.89 / 1.25 / 0.83 / 0.95	0.49 / 4.23E-04 / 3.65E-03 / 0.57
rs10757278	G	1.22 (1.08-1.38)	0.001063	rs10757278|rs10811658	0.00108	GA / AA / GG / AG	0.17 / 0.14 / 0.33 / 0.37	1.26 / 0.74 / 1.14 / 0.89	1.11E-02 / 4.88E-03 / 0.06 / 0.07
rs10811658	A	1.00 (0.88-1.13)	0.9563	rs10811658|rs10811659	0.675	AC / GC / AT / GT	0.19 / 0.03 / 0.11 / 0.67	1.04 / 1.16 / 0.91 / 1.00	0.59 / 0.45 / 0.34 / 0.94
rs10811659	C	1.06 (0.92-1.22)	0.459	rs10811659|rs10757282	0.0973	TC / CT / TT	0.43 / 0.22 / 0.35	1.10 / 1.06 / 0.87	0.15 / 0.42 / 0.03
rs10757282	C	1.09 (0.96-1.23)	0.1766	rs10757282|rs10811661	0.216	CC / CT / TT	0.16 / 0.27 / 0.57	0.97 / 1.13 / 0.92	0.71 / 0.08 / 0.19
rs10811661	C	1.03 (0.87-1.22)	0.7141	rs10811661|rs1333051	0.274	CT / CA / TA	0.10 / 0.06 / 0.84	0.87 / 1.17 / 1.02	0.18 / 0.22 / 0.83
rs1333051	T	0.89 (0.73-1.09)	0.2675	rs1333051|rs2065501	0.348	TA / AA / TC / AC	0.03 / 0.29 / 0.07 / 0.61	0.95 / 1.12 / 0.86 / 0.94	0.80 / 0.09 / 0.26 / 0.36
rs2065501	A	1.10 (0.97-1.25)	0.1342	rs2065501|rs10757287	0.277	AT / CT / AA / CA	0.09 / 0.04 / 0.23 / 0.65	1.16 / 0.81 / 1.06 / 0.93	0.17 / 0.26 / 0.42 / 0.28
rs10757287	T	1.06 (0.88-1.26)	0.5526	n/a	n/a	n/a	n/a	n/a	n/a

## Sheet: MI
		Single point		Two-point		Haplotype
SNP	Minor allele	OR (95% CI)	P	SNPs	Omnibus P	Haplotype	Freq.	OR	P
rs3217986	C	1.42 (1.10-1.83)	0.007216	rs3217986|rs523096	0.00549	AC / CT / AT	0.48 / 0.07 / 0.45	0.93 / 0.72 / 1.18	0.26 / 1.05E-02 / 1.00E-02
rs523096	C	0.93 (0.82-1.05)	0.2351	rs523096|rs10965215	0.622	CA / TA / CG / TG	0.03 / 0.40 / 0.45 / 0.12	0.83 / 1.04 / 0.95 / 1.09	0.42 / 0.57 / 0.39 / 0.40
rs10965215	A	1.02 (0.90-1.16)	0.7731	rs10965215|rs564398	0.778	GG / AA / GA	0.45 / 0.43 / 0.12	0.96 / 1.02 / 1.05	0.52 / 0.75 / 0.62
rs564398	G	0.95 (0.84-1.08)	0.4663	rs564398|rs1333034	0.785	AG / GA / AA	0.12 / 0.45 / 0.43	1.03 / 0.96 / 1.04	0.80 / 0.49 / 0.59
rs1333034	G	1.03 (0.85-1.26)	0.7427	rs1333034|rs8181047	0.398	AA / GG / AG	0.34 / 0.11 / 0.55	0.92 / 1.05 / 1.07	0.20 / 0.61 / 0.33
rs8181047	A	0.91 (0.79-1.04)	0.1569	rs8181047|rs10811647	0.266	GG / AC / GC	0.40 / 0.34 / 0.26	1.10 / 0.91 / 0.99	0.13 / 0.16 / 0.88
rs10811647	G	1.10 (0.97-1.25)	0.1417	rs10811647|rs1333039	0.336	CG / GC / CC	0.43 / 0.40 / 0.17	0.94 / 1.10 / 0.94	0.37 / 0.14 / 0.48
rs1333039	G	0.94 (0.83-1.07)	0.3632	rs1333039|rs16905599	0.0133	CA / GG / CG	0.06 / 0.43 / 0.51	0.71 / 0.93 / 1.16	1.70E-02 / 0.27 / 0.02
rs16905599	A	1.40 (1.06-1.85)	0.01708	rs16905599|rs1333040	0.00296	AC / GC / GT	0.06 / 0.38 / 0.57	0.70 / 0.88 / 1.22	1.32E-02 / 0.06 / 2.32E-03
rs1333040	C	1.23 (1.08-1.40)	0.001766	rs1333040|rs10757278	0.00803	CG / TG / CA / TA	0.04 / 0.45 / 0.39 / 0.12	0.94 / 1.24 / 0.80 / 1.02	0.72 / 1.41E-03 / 1.39E-03 / 0.85
rs10757278	G	1.22 (1.08-1.39)	0.00215	rs10757278|rs10811658	0.012	GA / AA / GG / AG	0.17 / 0.14 / 0.33 / 0.37	1.22 / 0.82 / 1.16 / 0.85	0.04 / 0.07 / 0.04 / 0.03
rs10811658	A	1.02 (0.89-1.17)	0.7646	rs10811658|rs10811659	0.949	AC / GC / AT / GT	0.19 / 0.03 / 0.11 / 0.67	1.02 / 1.11 / 1.00 / 0.97	0.80 / 0.66 / 1.00 / 0.70
rs10811659	C	1.04 (0.89-1.20)	0.6543	rs10811659|rs10757282	0.0213	TC / CT / TT	0.43 / 0.22 / 0.35	1.16 / 1.04 / 0.83	0.02 / 0.58 / 6.73E-03
rs10757282	C	1.15 (1.01-1.31)	0.03301	rs10757282|rs10811661	0.0994	CC / CT / TT	0.17 / 0.27 / 0.57	1.07 / 1.13 / 0.87	0.42 / 0.09 / 0.03
rs10811661	C	0.93 (0.78-1.11)	0.4159	rs10811661|rs1333051	0.675	CT / CA / TA	0.11 / 0.06 / 0.83	1.04 / 1.11 / 0.93	0.71 / 0.46 / 0.42
rs1333051	T	1.04 (0.85-1.28)	0.6798	rs1333051|rs2065501	0.0878	TA / AA / TC / AC	0.03 / 0.30 / 0.08 / 0.60	1.20 / 1.19 / 0.97 / 0.85	0.40 / 1.57E-02 / 0.81 / 1.83E-02
rs2065501	A	1.19 (1.04-1.36)	0.01116	rs2065501|rs10757287	0.0826	AT / CT / AA / CA	0.09 / 0.04 / 0.23 / 0.63	1.23 / 0.97 / 1.14 / 0.85	0.07 / 0.88 / 0.10 / 1.55E-02
rs10757287	T	1.14 (0.94-1.37)	0.1802	n/a	n/a	n/a	n/a	n/a	n/a

## Sheet: MI+AP
		Single point		Two-point		Haplotype
SNP	Minor allele	OR (95% CI)	P	SNPs	Omnibus P	Haplotype	Freq	OR	P
rs3217986	C	1.41 (1.02-1.97)	0.03946	rs3217986|rs523096	0.00632	AC / AT / CT	0.47 / 0.07 / 0.46	0.86 / 1.28 / 0.72	0.08 / 3.40E-03 / 0.05
rs523096	C	0.86 (0.74-1.02)	0.07962	rs523096|rs10965215	0.388	CA / TA / CG / TG	0.03 / 0.41 / 0.44 / 0.13	0.84 / 1.12 / 0.88 / 1.08	0.57 / 0.17 / 0.12 / 0.54
rs10965215	A	1.10 (0.93-1.30)	0.249	rs10965215|rs564398	0.414	GG / AA / GA	0.44 / 0.43 / 0.12	0.90 / 1.11 / 1.02	0.20 / 0.23 / 0.88
rs564398	G	0.90 (0.76-1.05)	0.1849	rs564398|rs1333034	0.382	AG / GA / AA	0.12 / 0.44 / 0.44	1.00 / 0.90 / 1.12	1.00 / 0.19 / 0.19
rs1333034	G	1.01 (0.78-1.31)	0.9233	rs1333034|rs8181047	0.312	AA / GG / AG	0.34 / 0.11 / 0.55	0.88 / 1.04 / 1.12	0.15 / 0.79 / 0.19
rs8181047	A	0.87 (0.73-1.04)	0.1218	rs8181047|rs10811647	0.0444	GG / AC / GC	0.42 / 0.34 / 0.25	1.24 / 0.87 / 0.90	1.26E-02 / 0.12 / 0.28
rs10811647	G	1.23 (1.04-1.46)	0.01451	rs10811647|rs1333039	0.0476	CG / GC / CC	0.43 / 0.42 / 0.16	0.88 / 1.23 / 0.87	0.15 / 1.47E-02 / 0.22
rs1333039	G	0.89 (0.75-1.05)	0.1549	rs1333039|rs16905599	0.00866	GG / CG / CA	0.06 / 0.43 / 0.52	0.88 / 1.25 / 0.65	0.14 / 8.62E-03 / 0.02
rs16905599	A	1.54 (1.06-2.23)	0.02468	rs16905599|rs1333040	0.00203	GT / GC / AC	0.05 / 0.38 / 0.57	1.30 / 0.84 / 0.61	2.36E-03 / 0.05 / 1.32E-02
rs1333040	C	1.32 (1.11-1.56)	0.001275	rs1333040|rs10757278	0.00196	TG / CG / TA / CA	0.04 / 0.47 / 0.38 / 0.11	1.37 / 1.01 / 0.96 / 0.73	2.33E-04 / 0.96 / 0.78 / 4.02E-04
rs10757278	G	1.37 (1.16-1.61)	0.0002021	rs10757278|rs10811658	0.00213	GA / AA / GG / AG	0.17 / 0.14 / 0.34 / 0.35	1.32 / 0.79 / 1.27 / 0.75	0.02 / 0.10 / 8.96E-03 / 2.45E-03
rs10811658	A	1.04 (0.88-1.25)	0.6351	rs10811658|rs10811659	0.603	AC / GC / AT / GT	0.20 / 0.03 / 0.11 / 0.66	1.12 / 1.15 / 0.89 / 0.96	0.29 / 0.59 / 0.39 / 0.61
rs10811659	C	1.12 (0.92-1.35)	0.2602	rs10811659|rs10757282	0.143	TC / CT / TT	0.43 / 0.22 / 0.35	1.08 / 1.13 / 0.84	0.37 / 0.22 / 0.06
rs10757282	C	1.07 (0.90-1.26)	0.4353	rs10757282|rs10811661	0.696	CT / TT / CC	0.16 / 0.27 / 0.57	1.08 / 0.94 / 1.01	0.42 / 0.44 / 0.94
rs10811661	C	0.99 (0.79-1.24)	0.9315	rs10811661|rs1333051	0.318	CT / TA / CA	0.10 / 0.06 / 0.84	0.88 / 0.99 / 1.25	0.39 / 0.95 / 0.19
rs1333051	T	0.88 (0.66-1.16)	0.3683	rs1333051|rs2065501	0.282	TA / AA / TC / AC	0.03 / 0.30 / 0.07 / 0.60	0.91 / 1.19 / 0.85 / 0.90	0.75 / 0.06 / 0.38 / 0.22
rs2065501	A	1.16 (0.98-1.38)	0.0903	rs2065501|rs10757287	0.143	AT / CT / AA / CA	0.10 / 0.04 / 0.23 / 0.64	1.32 / 0.77 / 1.07 / 0.89	0.05 / 0.32 / 0.52 / 0.19
rs10757287	T	1.15 (0.91-1.46)	0.2457	n/a	n/a	n/a	n/a	n/a	n/a

## Sheet: Stroke
		Single point		Two-point		Haplotype
SNP	Minor allele	OR (95% CI)	P	SNPs	Omnibus P	Haplotype	Frequency	OR	P
rs3217986	C	0.99 (0.76-1.28)	0.9221	rs3217986|rs523096	0.963	AC / CT / AT	0.48 / 0.08 / 0.44	0.98 / 1.00 / 1.02	0.82 / 1.00 / 0.79
rs523096	C	0.97 (0.85-1.12)	0.7168	rs523096|rs10965215	0.834	CA / TA / CG / TG	0.03 / 0.40 / 0.46 / 0.12	0.95 / 1.06 / 0.98 / 0.93	0.82 / 0.44 / 0.79 / 0.51
rs10965215	A	1.05 (0.91-1.21)	0.5206	rs10965215|rs564398	0.707	GG / AA / GA	0.45 / 0.43 / 0.12	0.98 / 1.05 / 0.93	0.79 / 0.49 / 0.51
rs564398	G	0.98 (0.85-1.13)	0.7706	rs564398|rs1333034	0.894	AG / GA / AA	0.11 / 0.45 / 0.43	0.97 / 0.98 / 1.03	0.77 / 0.80 / 0.66
rs1333034	G	0.98 (0.78-1.22)	0.8249	rs1333034|rs8181047	0.184	AA / GG / AG	0.33 / 0.11 / 0.56	0.88 / 1.00 / 1.13	0.09 / 0.99 / 0.09
rs8181047	A	0.87 (0.75-1.01)	0.07006	rs8181047|rs10811647	0.11	GG / AC / GC	0.40 / 0.34 / 0.27	1.01 / 0.87 / 1.16	0.94 / 0.08 / 0.07
rs10811647	G	1.00 (0.87-1.16)	0.9686	rs10811647|rs1333039	0.978	CG / GC / CC	0.44 / 0.40 / 0.17	1.01 / 1.00 / 0.98	0.90 / 0.97 / 0.84
rs1333039	G	1.01 (0.87-1.16)	0.9273	rs1333039|rs16905599	0.961	CA / GG / CG	0.07 / 0.44 / 0.50	0.96 / 1.01 / 1.00	0.79 / 0.87 / 0.98
rs16905599	A	0.96 (0.73-1.28)	0.7941	rs16905599|rs1333040	0.19	AC / GC / GT	0.06 / 0.38 / 0.56	0.96 / 0.88 / 1.14	0.81 / 0.09 / 0.07
rs1333040	C	0.89 (0.77-1.02)	0.0935	rs1333040|rs10757278	0.0936	CG / TG / CA / TA	0.04 / 0.44 / 0.40 / 0.13	0.78 / 1.03 / 0.91 / 1.26	0.23 / 0.66 / 0.18 / 0.03
rs10757278	G	1.00 (0.87-1.15)	0.9476	rs10757278|rs10811658	0.737	GA / AA / GG / AG	0.16 / 0.15 / 0.31 / 0.38	1.11 / 1.00 / 0.95 / 1.00	0.35 / 0.97 / 0.49 / 0.98
rs10811658	A	1.05 (0.91-1.22)	0.5057	rs10811658|rs10811659	0.383	AC / GC / AT / GT	0.19 / 0.03 / 0.12 / 0.66	0.94 / 1.06 / 1.20 / 0.95	0.52 / 0.78 / 0.10 / 0.52
rs10811659	C	0.96 (0.81-1.14)	0.6476	rs10811659|rs10757282	0.0272	TC / CT / TT	0.44 / 0.21 / 0.35	1.21 / 0.96 / 0.84	9.69E-03 / 0.67 / 0.02
rs10757282	C	1.20 (1.04-1.38)	0.01127	rs10757282|rs10811661	0.0414	CC / CT / TT	0.17 / 0.27 / 0.56	1.11 / 1.16 / 0.83	0.27 / 0.06 / 1.19E-02
rs10811661	C	1.11 (0.92-1.34)	0.2651	rs10811661|rs1333051	0.546	CT / CA / TA	0.11 / 0.06 / 0.83	1.11 / 1.08 / 0.90	0.33 / 0.63 / 0.27
rs1333051	T	1.11 (0.89-1.38)	0.3595	rs1333051|rs2065501	0.575	TA / AA / TC / AC	0.04 / 0.28 / 0.08 / 0.60	1.34 / 1.05 / 1.05 / 0.92	0.20 / 0.56 / 0.72 / 0.27
rs2065501	A	1.08 (0.92-1.25)	0.3476	rs2065501|rs10757287	0.387	AT / CT / AA / CA	0.09 / 0.04 / 0.23 / 0.65	1.21 / 0.85 / 1.01 / 0.95	0.13 / 0.45 / 0.91 / 0.49
rs10757287	T	1.07 (0.87-1.32)	0.5077	n/a	n/a	n/a	n/a	n/a	n/a
